# Supplementary material for: Polypyrrole-Barium Ferrite Magnetic Cryogels for Water Purification
Source: MDPI journal article supplement (doi:10.3390/gels9020092), 2023-01-20
Supplement: s1 [file s1]

# Polypyrrole-Barium Ferrite Magnetic Cryogels for Water Purification

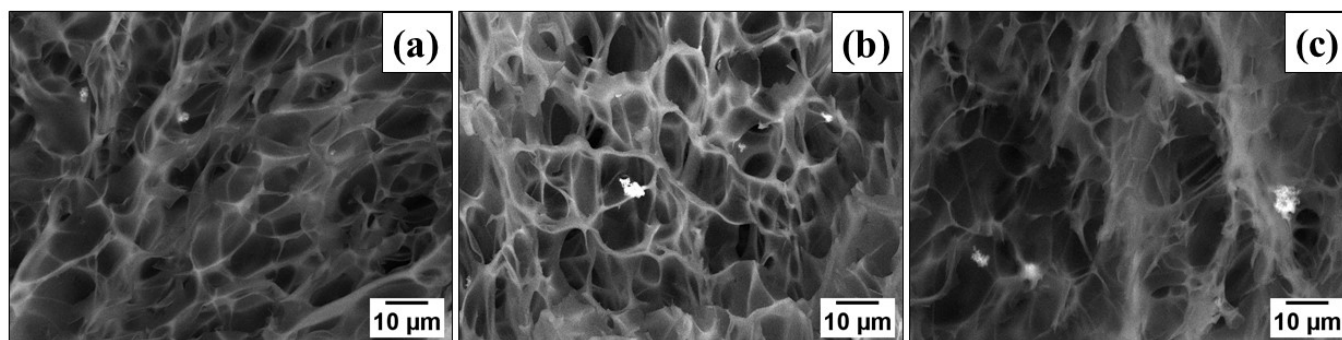

**Figure S1.** SEM/BSE images of PPy-G-BaFe aerogels, synthesized using (a) 1 wt% of BaFe, (b) 2 wt% of BaFe and (c) 5 wt% of BaFe.

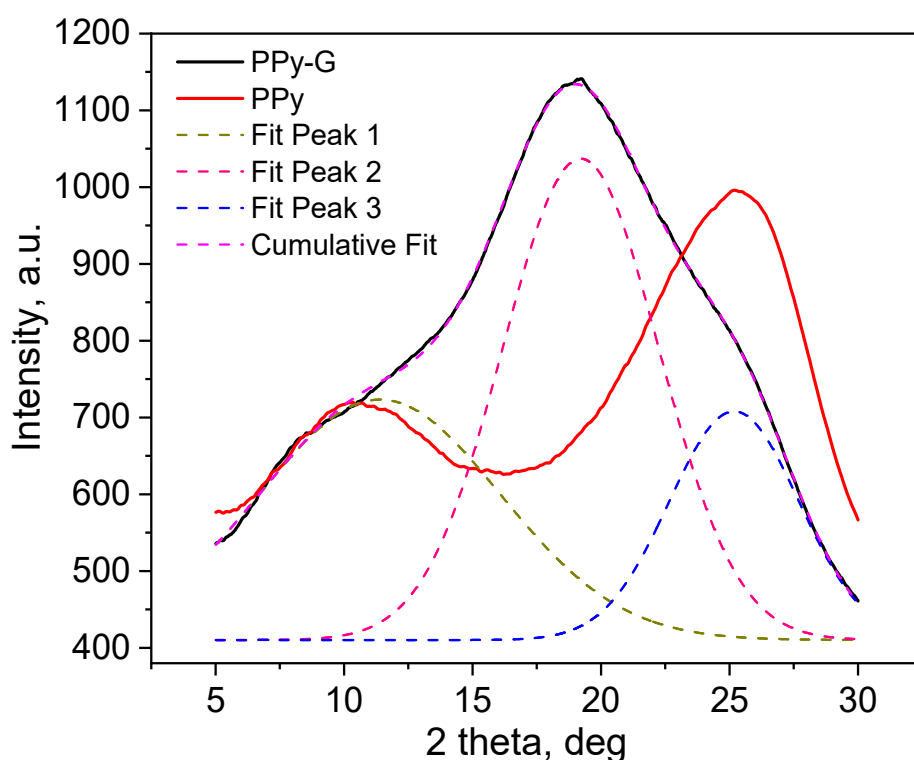

**Figure S2.** Peak deconvolution of the amorphous peak in PPy-G aerogel spectrum in comparison to the spectrum of pristine PPy.

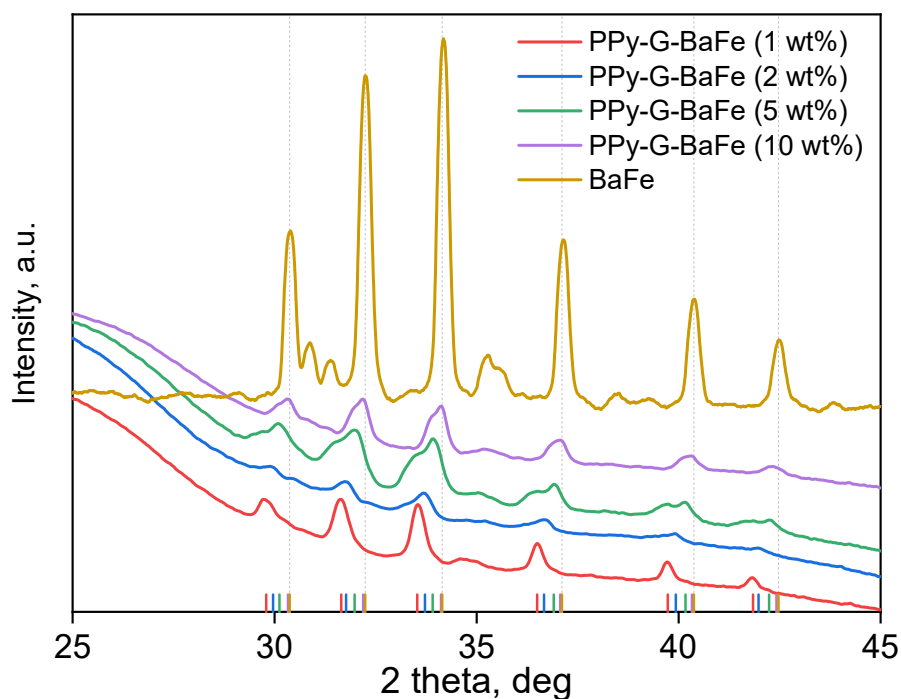

**Figure S3.** Detail of the XRD patterns of PPy-G-BaFe aerogels, prepared using various fractions of BaFe, and pristine BaFe from 25 to 45 degrees, highlighting the shift of BaFe peaks to lower angles.

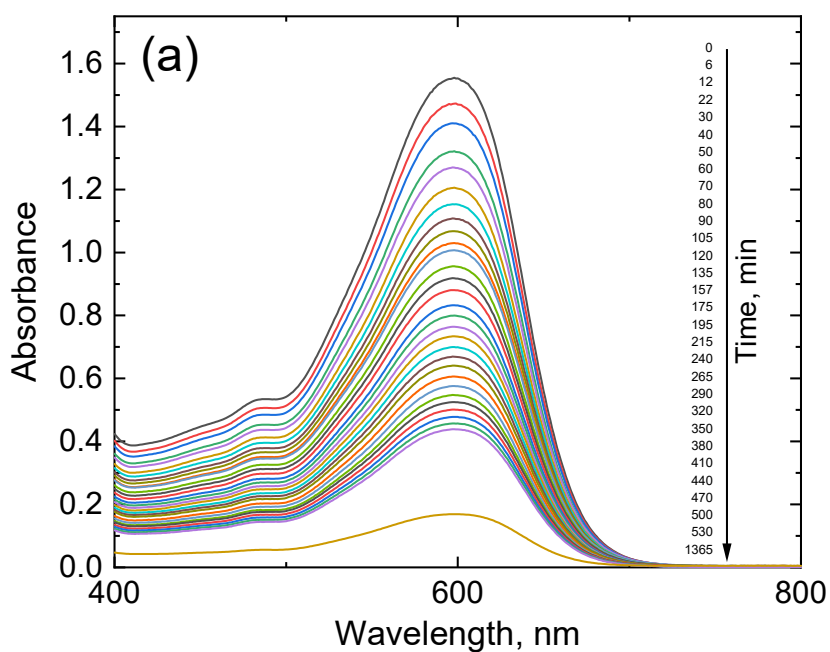

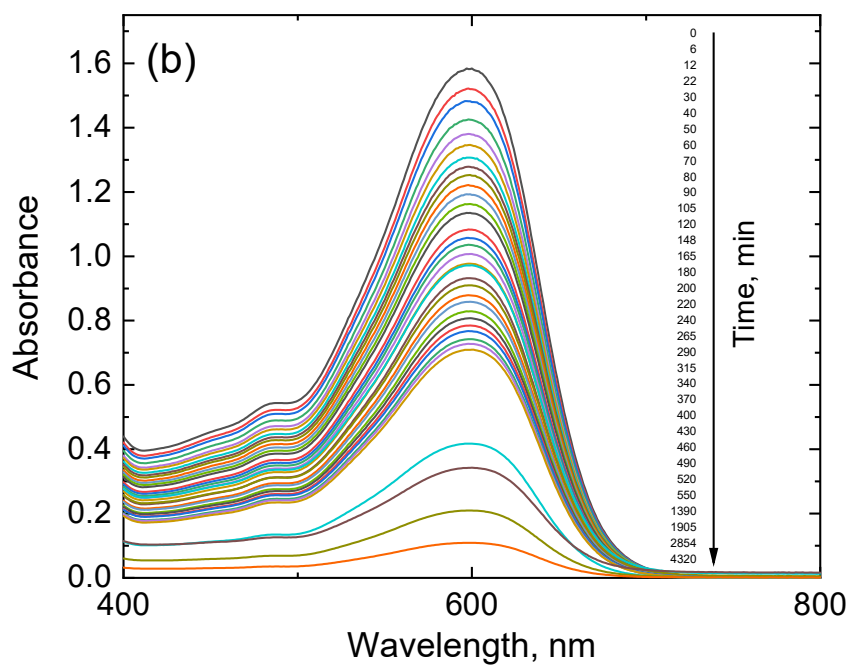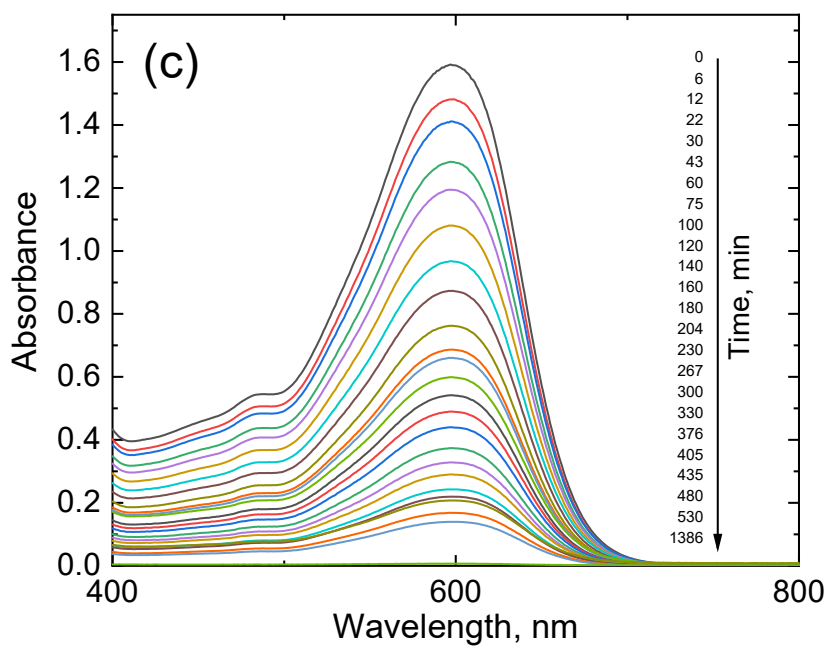

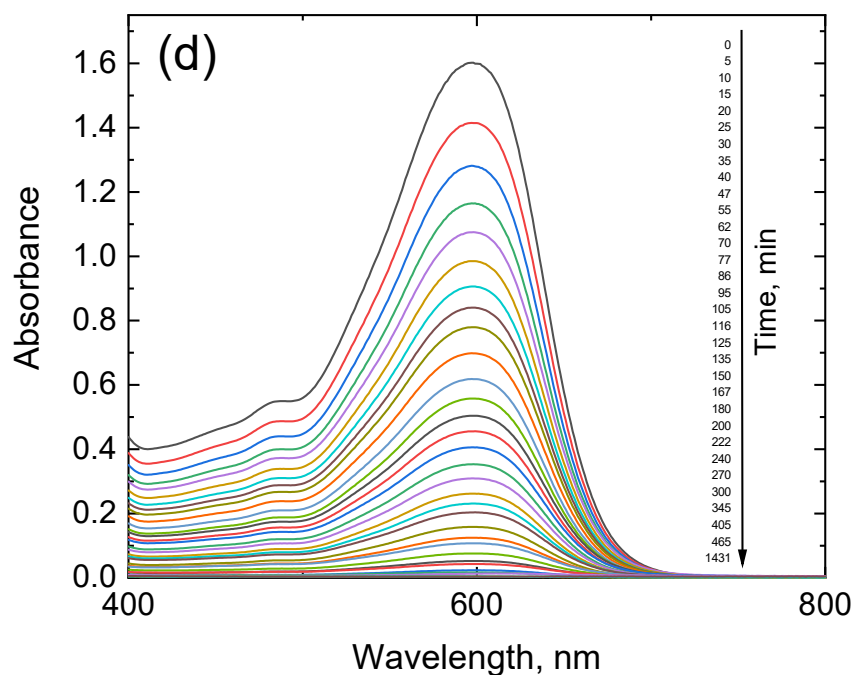

**Figure S4.** Evolution of UV-vis spectra of Reactive Black 5 solution ( $50 \text{ mg l}^{-1}$ ) over time during the adsorption studies with (a) 52 mg of PPy-G aerogel, (b) 26 mg of PPy-G-BaFe aerogel, prepared at 10 wt% BaFe fraction (c) 52 mg of PPy-G-BaFe aerogel, prepared at 10 wt% BaFe fraction, and (d) 104 mg of PPy-G-BaFe aerogel, prepared at 10 wt% BaFe fraction.

**Table S1.** Adsorption capacity of various materials towards Reactive Black 5.

| Material                                      | Adsorption capacity, $\text{mg g}^{-1}$ | Reference |
|-----------------------------------------------|-----------------------------------------|-----------|
| Powdered activated carbon                     | 58.8                                    | [1]       |
| Walnut activated carbon                       | 19.3                                    | [2]       |
| Polyhydroxyl dendrimer magnetic nanoparticles | 62.1                                    | [3]       |
| CTAB-modified zeolite                         | 15.9                                    | [4]       |
| Poly(p-phenylenediamine) / maghemite          | 233                                     | [5]       |
| Poly(3,4-ethylenedioxythiophene) / maghemite  | 60                                      | [6]       |
| Polypyrrole / zeolite                         | 122.3                                   | [7]       |
| Polyaniline / magnetite                       | 63.7                                    | [8]       |

## References

1. Eren, Z.; Acar, F.N. Adsorption of Reactive Black 5 from an aqueous solution: Equilibrium and kinetic studies. *Desalination* **2006**, *194*, 1–10. <https://doi.org/10.1016/j.desal.2005.10.022>.
2. Heibati, B.; Rodriguez-Couto, S.; Amrane, A.; Rafatullah, M.; Hawari, A.; Al-Ghouti, M.A. Uptake of Reactive Black 5 by pumice and walnut activated carbon: Chemistry and adsorption mechanisms. *J. Ind. Eng. Chem.* **2014**, *20*, 2939–2947. <https://doi.org/10.1016/j.jiec.2013.10.063>.
3. Galangash, M.M.; Ghavidast, A.; Bozorgpanah, Z. Adsorption of acid red 114 and reactive black 5 in aqueous solutions on dendrimer-conjugated magnetic nanoparticles. *J. Chin. Chem. Soc.* **2019**, *66*, 62–74. <https://doi.org/10.1002/jccs.201800177>.
4. Karadag, D.; Turan, M.; Akgul, E.; Tok, S.; Faki, A. Adsorption equilibrium and kinetics of reactive black 5 and reactive red 239 in aqueous solution onto surfactant-modified zeolite. *J. Chem. Eng. Data* **2007**, *52*, 1615–1620. <https://doi.org/10.1021/je7000057>.
5. Minisy, I.M.; Zasońska, B.A.; Petrovský, E.; Veverka, P.; Šeděnková, I.; Hromádková, J.; Bober, P. (Poly(p-phenylenediamine)/maghemite composite as highly effective adsorbent for anionic dye removal. *React. Funct. Polym.* **2020**, *146*, 104436. <https://doi.org/10.1016/j.reactfunctpolym.2019.104436>.
6. Gupta, S.; Zasońska, B.A.; Acharya, U.; Konefał, M.; Pokorný, V.; Petrovsky, E.; Breitenbach, S.; Unterweger, C.; Bober, P. Magnetoconductive poly(3,4-ethylenedioxythiophene)/maghemite adsorbent for the removal of Reactive Black 5 from aqueous media. *Mater. Chem. Phys.* **2022**, *292*, 126753. <https://doi.org/10.1016/j.matchemphys.2022.126753>.
7. Senguttuvan, S.; Janaki, V.; Senthilkumar, P.; Kamala-Kannan, S. Polypyrrole/zeolite composite - A nanoadsorbent for reactive dyes removal from synthetic solution. *Chemosphere* **2022**, *287*, 132164. <https://doi.org/10.1016/j.chemosphere.2021.132164>.
8. Hamzehloo, M.; Farahani, B.K.A.; Rostamian, R. Adsorption Behaviour of Reactive Black Dye 5 by Magnetically Separable Nanoadsorbent. *Phys. Chem. Res.* **2019**, *7*, 475–490. <https://doi.org/10.22036/pcr.2019.186198.1639>.
